# Supplementary material
Source: MDPI journal article supplement (https://www.mdpi.com/2073-4344/9/2/177)
Supplement: s1 [file s1]

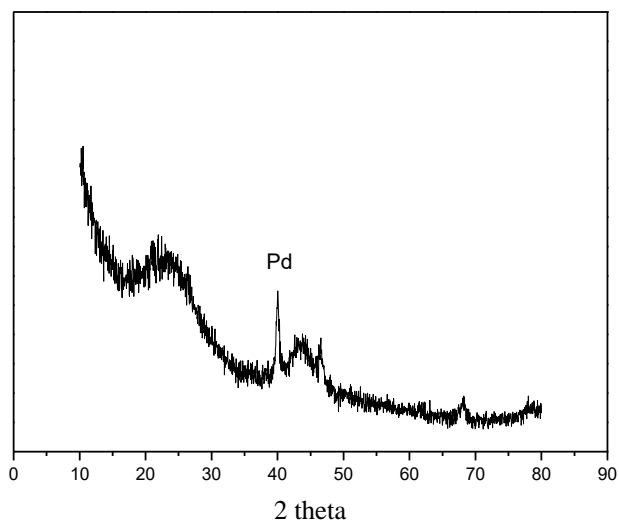

Figure S1. The XRD pattern of unreduced Pd/C.

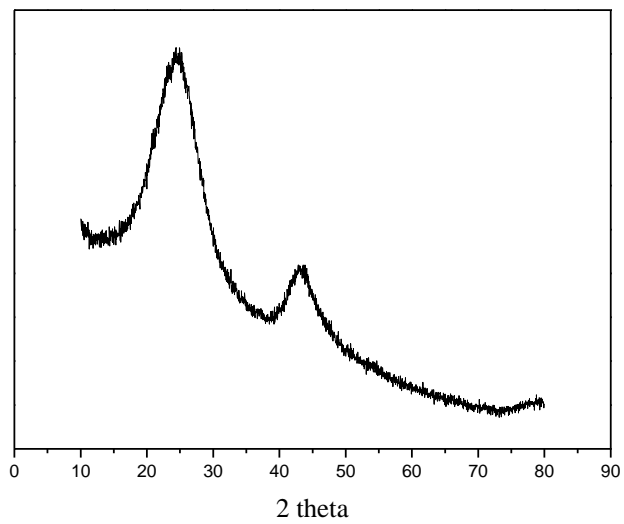

Figure S2. The XRD pattern of high dispersed PdCl<sub>2</sub> on Pd/C treated with aqua regia.
